# Supplementary material
Source: PubMed Central journal article supplement (PMC4091912)
Supplement: NIHMS598285-supplement-Supp_FigureS1-S5.pdf [file NIHMS598285-supplement-Supp_FigureS1-S5.pdf]

**A**

mouse 1

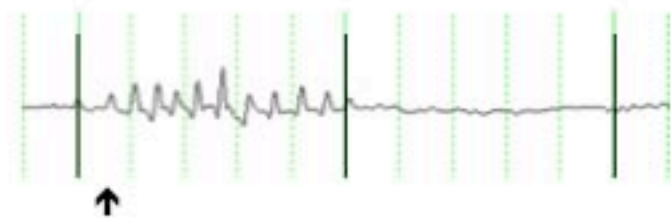

mouse 2

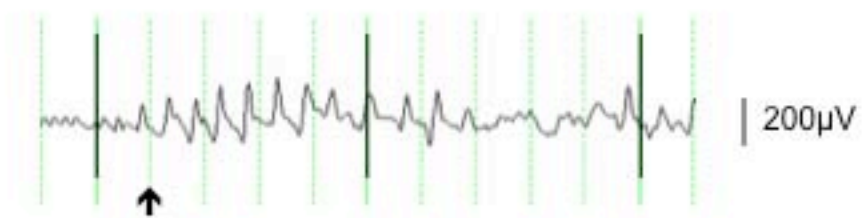**B**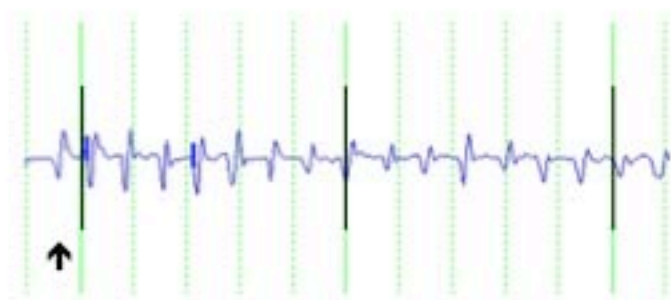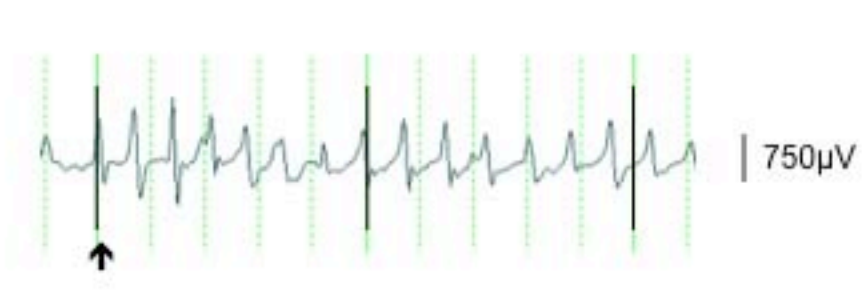**C**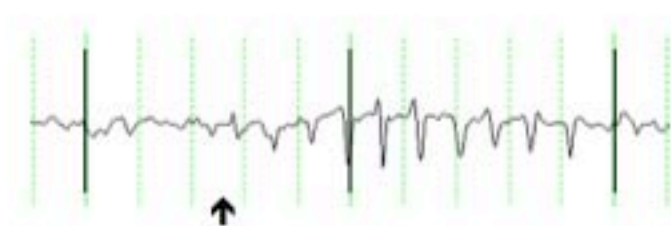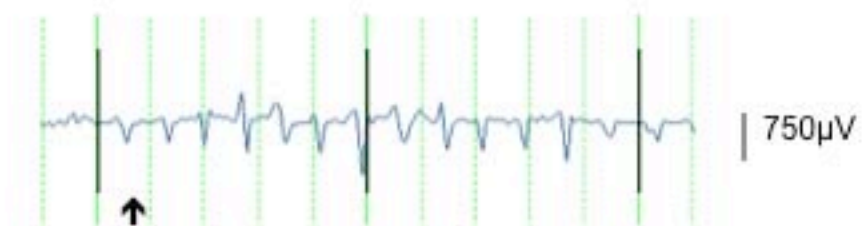

1s

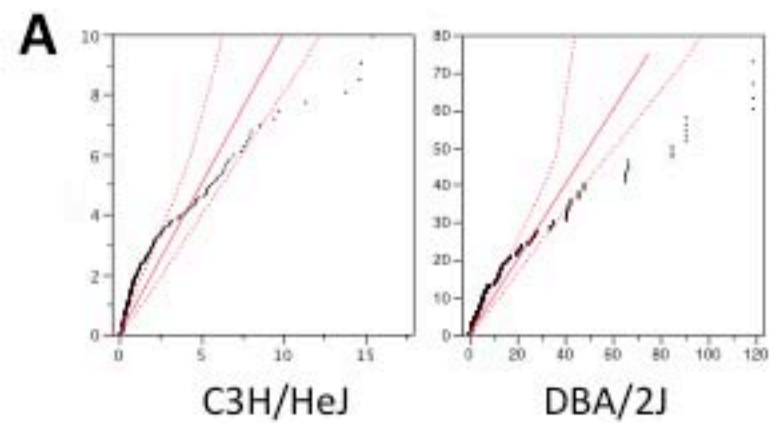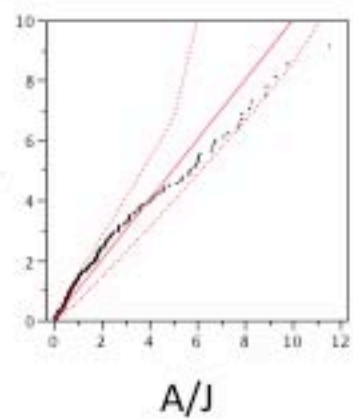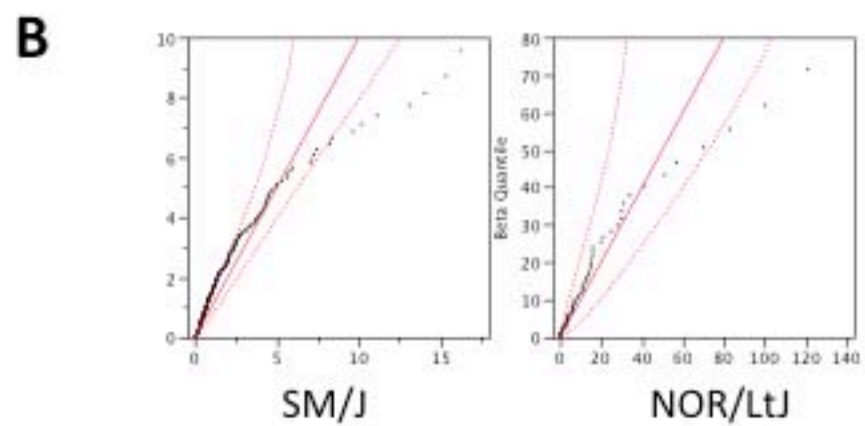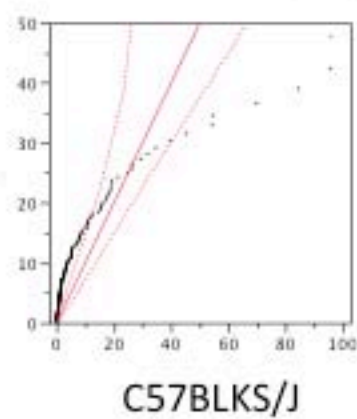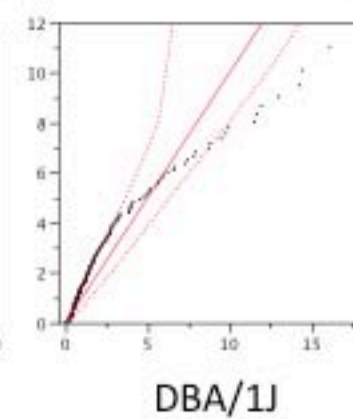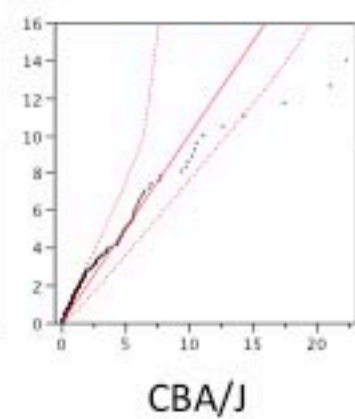

|                         | CBA/J | C3H/HeJ | DBA/2J | SM/J | DBA/1J | A/J | C57BLKS/J | NOR/LtJ | AKR/J | ILnJ | MRL/MpJ | P/J | BALB/cByJ | PL/J | NOD/ShiLtJ | SWR/J | C57BL/10J | SJL/J | FVB/NJ | C57BL/6J | C57BL/6NJ | LP/J | BTBR_T+ <sub>tf</sub> J | 129S1/SvImJ | NZB/BINJ | NZW/LacJ | test SWD+ vs SWD- |
|-------------------------|-------|---------|--------|------|--------|-----|-----------|---------|-------|------|---------|-----|-----------|------|------------|-------|-----------|-------|--------|----------|-----------|------|-------------------------|-------------|----------|----------|-------------------|
| CBA/J                   | -     | 93      | 85     | 83   | 85     | 84  | 79        | 79      | 82    | 81   | 84      | 80  | 84        | 82   | 79         | 79    | 77        | 80    | 80     | 77       | 77        | 77   | 78                      | 78          | 77       | 76       | 0.036             |
| C3H/HeJ                 | 93    | -       | 84     | 81   | 84     | 87  | 79        | 79      | 82    | 80   | 85      | 80  | 85        | 82   | 79         | 79    | 77        | 80    | 80     | 77       | 77        | 78   | 78                      | 77          | 76       | 0.053    |                   |
| DBA/2J                  | 85    | 84      | -      | 80   | 97     | 80  | 82        | 79      | 80    | 82   | 80      | 82  | 80        | 80   | 79         | 78    | 77        | 79    | 78     | 77       | 77        | 77   | 78                      | 77          | 76       | 0.062    |                   |
| SM/J                    | 83    | 81      | 80     | -    | 80     | 90  | 78        | 79      | 80    | 79   | 80      | 80  | 80        | 80   | 79         | 80    | 78        | 79    | 80     | 78       | 78        | 77   | 79                      | 77          | 78       | 77       | 0.066             |
| DBA/1J                  | 85    | 84      | 97     | 80   | -      | 80  | 82        | 79      | 80    | 82   | 81      | 82  | 81        | 80   | 78         | 78    | 78        | 79    | 79     | 78       | 78        | 78   | 78                      | 77          | 78       | 77       | 0.082             |
| A/J                     | 84    | 87      | 80     | 80   | 80     | -   | 77        | 80      | 83    | 80   | 83      | 78  | 89        | 82   | 80         | 80    | 77        | 81    | 81     | 77       | 77        | 77   | 79                      | 77          | 78       | 76       | 0.294             |
| C57BLKS/J               | 79    | 79      | 82     | 78   | 82     | 77  | -         | 82      | 78    | 78   | 79      | 80  | 79        | 79   | 78         | 78    | 92        | 79    | 78     | 93       | 93        | 78   | 80                      | 78          | 78       | 77       | 0.477             |
| NOR/LtJ                 | 79    | 79      | 79     | 79   | 79     | 80  | 82        | -       | 81    | 78   | 80      | 78  | 80        | 80   | 96         | 82    | 80        | 81    | 82     | 80       | 80        | 77   | 78                      | 78          | 78       | 77       | 0.532             |
| AKR/J                   | 82    | 82      | 80     | 80   | 80     | 83  | 78        | 81      | -     | 80   | 86      | 79  | 83        | 85   | 81         | 80    | 78        | 81    | 80     | 78       | 78        | 78   | 79                      | 77          | 78       | 77       | 0.319             |
| ILnJ                    | 81    | 80      | 82     | 79   | 82     | 80  | 78        | 78      | 80    | -    | 79      | 80  | 80        | 79   | 78         | 78    | 77        | 78    | 79     | 77       | 77        | 77   | 77                      | 78          | 78       | 78       | 0.011             |
| MRL/MpJ                 | 84    | 85      | 80     | 80   | 81     | 83  | 79        | 80      | 86    | 79   | -       | 79  | 83        | 84   | 80         | 79    | 78        | 81    | 80     | 78       | 78        | 77   | 78                      | 77          | 78       | 78       | 0.027             |
| P/J                     | 80    | 80      | 82     | 80   | 82     | 78  | 80        | 78      | 79    | 80   | 79      | -   | 80        | 80   | 78         | 78    | 79        | 79    | 78     | 79       | 79        | 78   | 79                      | 78          | 77       | 78       | 0.048             |
| BALB/cByJ               | 84    | 85      | 80     | 80   | 81     | 89  | 79        | 80      | 83    | 80   | 83      | 80  | -         | 82   | 80         | 80    | 79        | 81    | 81     | 79       | 79        | 79   | 79                      | 78          | 78       | 76       | 0.074             |
| PL/J                    | 82    | 82      | 80     | 80   | 80     | 82  | 79        | 80      | 85    | 79   | 84      | 80  | 82        | -    | 81         | 80    | 78        | 81    | 80     | 78       | 78        | 78   | 79                      | 78          | 78       | 78       | 0.082             |
| NOD/ShiLtJ              | 79    | 79      | 79     | 79   | 78     | 80  | 78        | 96      | 81    | 78   | 80      | 78  | 80        | 81   | -          | 83    | 77        | 82    | 82     | 78       | 78        | 77   | 78                      | 77          | 78       | 77       | 0.393             |
| SWR/J                   | 79    | 79      | 78     | 80   | 78     | 80  | 78        | 82      | 80    | 78   | 79      | 78  | 80        | 80   | 83         | -     | 78        | 87    | 89     | 78       | 78        | 78   | 79                      | 78          | 78       | 78       | 0.494             |
| C57BL/10J               | 77    | 77      | 77     | 78   | 78     | 77  | 92        | 80      | 78    | 77   | 78      | 79  | 79        | 78   | 77         | 78    | -         | 78    | 78     | 98       | 98        | 76   | 80                      | 77          | 78       | 77       | 0.732             |
| SJL/J                   | 80    | 80      | 79     | 79   | 79     | 81  | 79        | 81      | 81    | 78   | 81      | 79  | 81        | 81   | 82         | 87    | 78        | -     | 87     | 78       | 78        | 77   | 78                      | 78          | 78       | 78       | 0.826             |
| FVB/NJ                  | 80    | 80      | 78     | 80   | 79     | 81  | 78        | 82      | 80    | 79   | 80      | 78  | 81        | 80   | 82         | 89    | 78        | 87    | -      | 78       | 78        | 77   | 79                      | 78          | 78       | 77       | 0.852             |
| C57BL/6J                | 77    | 77      | 77     | 78   | 78     | 77  | 93        | 80      | 78    | 77   | 78      | 79  | 78        | 78   | 78         | 78    | 98        | 78    | 78     | -        | 100       | 77   | 80                      | 77          | 78       | 77       | 0.711             |
| C57BL/6NJ               | 77    | 77      | 77     | 78   | 78     | 77  | 93        | 80      | 78    | 77   | 78      | 79  | 78        | 78   | 78         | 78    | 98        | 78    | 78     | 100      | -         | 77   | 80                      | 77          | 78       | 77       | 0.711             |
| LP/J                    | 77    | 78      | 77     | 77   | 78     | 77  | 78        | 77      | 78    | 77   | 77      | 78  | 79        | 78   | 77         | 78    | 76        | 77    | 77     | 77       | 77        | -    | 87                      | 92          | 78       | 77       | 0.188             |
| BTBR T+ <sub>tf</sub> J | 78    | 78      | 78     | 79   | 78     | 79  | 80        | 78      | 79    | 77   | 78      | 79  | 79        | 78   | 79         | 78    | 79        | 80    | 78     | 79       | 80        | 80   | 87                      | -           | 84       | 78       | 0.168             |
| 129S1/SvImJ             | 78    | 78      | 77     | 77   | 77     | 77  | 78        | 78      | 77    | 77   | 77      | 78  | 78        | 78   | 77         | 78    | 77        | 78    | 78     | 77       | 77        | 77   | 92                      | 84          | -        | 78       | 0.183             |
| NZB/BINJ                | 77    | 77      | 77     | 78   | 78     | 78  | 78        | 78      | 78    | 78   | 78      | 77  | 78        | 78   | 78         | 78    | 78        | 78    | 78     | 78       | 78        | 78   | 78                      | 78          | -        | 83       | 0.107             |
| NZW/LacJ                | 76    | 76      | 76     | 77   | 77     | 76  | 77        | 77      | 77    | 78   | 78      | 78  | 76        | 78   | 77         | 78    | 77        | 78    | 77     | 77       | 77        | 77   | 77                      | 78          | 83       | -        | 0.008             |

SWD  
(binary)

selected significant SNPs

$q < 0.05$

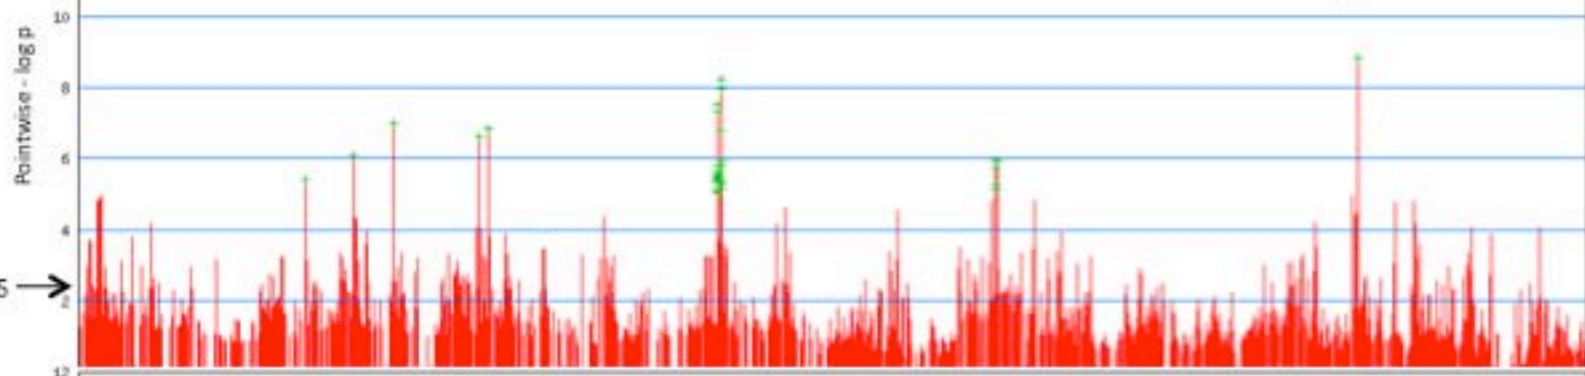

SWD  
length  
(s)

selected significant SNPs

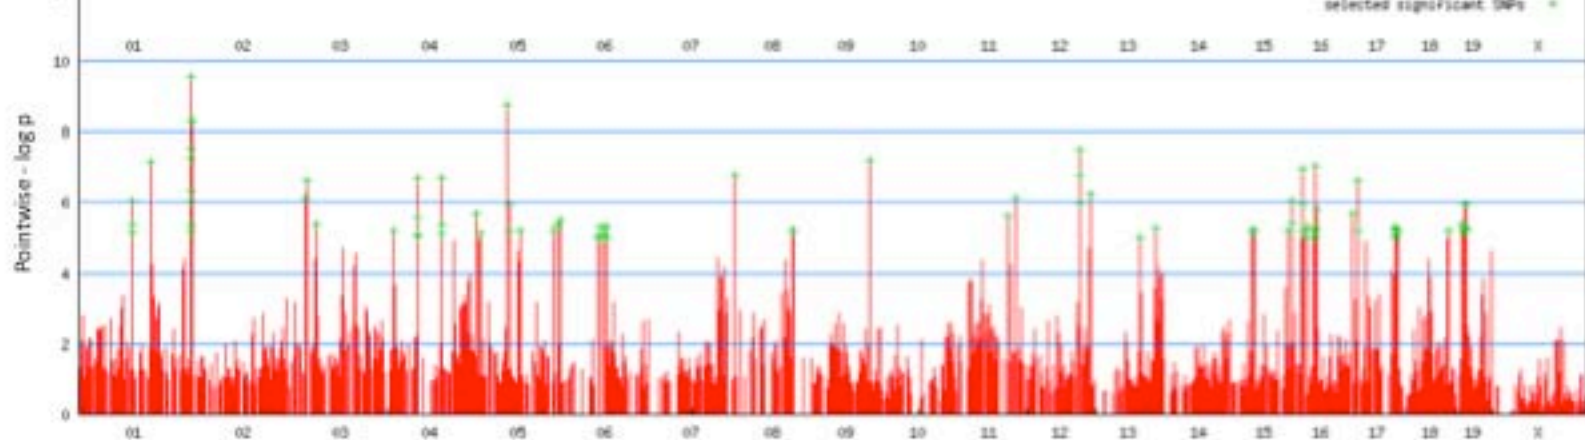

SWD  
incidence  
(# per hr)

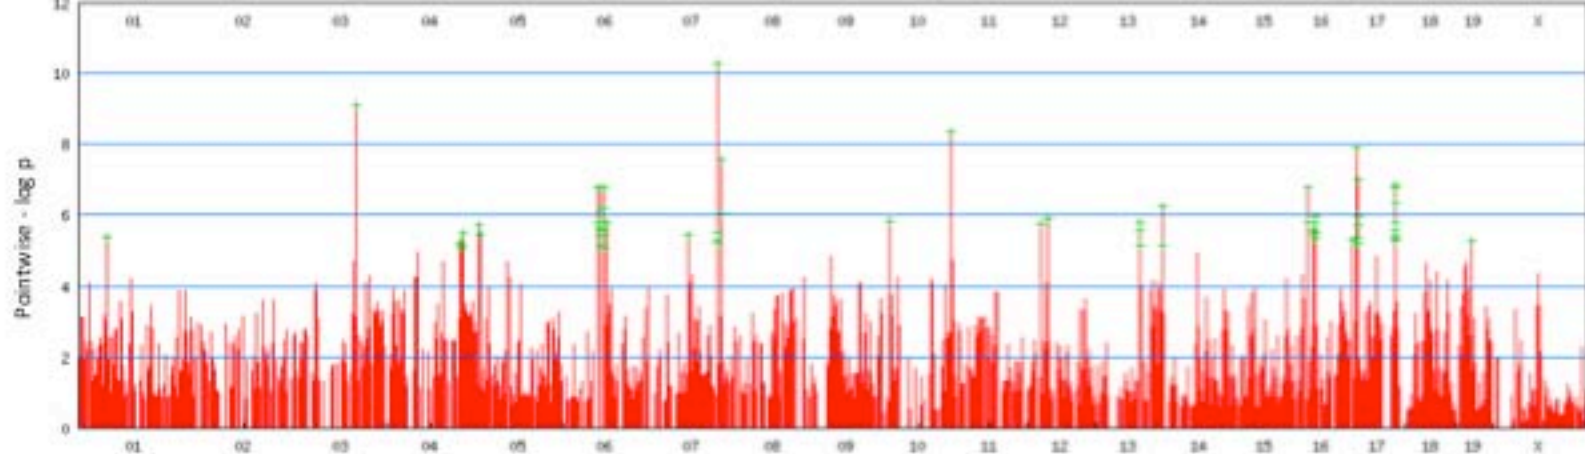

Chromosome

| Strain       | Chr 17 | Chr7-2 | Chr 7-1 | Chr1 | Chr6 | SWD (bin) | SWD (inc) | SWD (len) |
|--------------|--------|--------|---------|------|------|-----------|-----------|-----------|
| C3H/HeJ      | S      | S      | S       | S    | S    | 1         | 14.25     | 2.45      |
| DBA/1J       | S      | S      | S       | S    | S    | 1         | 21.4      | 2.7       |
| DBA/2J       | S      | S      | S       | S    | S    | 1         | 4.3       | 1.3       |
| SM/J         | S      | R      | S       | R    | S    | 1         | 19.95     | 0.95      |
| A/J          | S      | R      | R       | S    | R    | 1         | 6.5       | 2.05      |
| CBA/J        | S      | S      | S       | S    | S    | 1         | 7.05      | 1.3       |
| C57BLKS/J    | R      | S      | R       | R    | R    | 1         | 12.95     | 0.6       |
| NOR/LtJ      | R      | S      | S       | R    | R    | 1         | 3.05      | 1.5       |
| I/LnJ        | R      | R      | S       | R    | R    | 0         | 0         | 0         |
| MRL/MpJ      | S      | R      | R       | R    | R    | 0         | 0         | 0         |
| PL/J         | R      | R      | S       | R    | R    | 0         | 0         | 0         |
| AKR/J        | R      | R      | R       | R    | R    | 0         | 0         | 0         |
| 129S1/SvimJ  | R      | R      | R       | R    | R    | 0         | 0         | 0         |
| BALB/cByJ    | R      | R      | R       | R    | R    | 0         | 0         | 0         |
| BTBRT<+>tf/J | R      | R      | R       | R    | R    | 0         | 0         | 0         |
| C57BL/10J    | R      | R      | R       | R    | R    | 0         | 0         | 0         |
| C57BL/6J     | R      | R      | R       | R    | R    | 0         | 0         | 0         |
| C57BL/6NJ    | R      | R      | R       | R    | R    | 0         | 0         | 0         |
| C57L/J       | R      | R      | R       | R    | R    | 0         | 0         | 0         |
| FVB/NJ       | R      | R      | R       | R    | R    | 0         | 0         | 0         |
| LP/J         | R      | R      | R       | R    | R    | 0         | 0         | 0         |
| NOD/LtJ      | R      | R      | R       | R    | R    | 0         | 0         | 0         |
| NZB/BINJ     | R      | R      | R       | R    | R    | 0         | 0         | 0         |
| NZW/LacJ     | R      | R      | R       | R    | R    | 0         | 0         | 0         |
| P/J          | R      | R      | R       | R    | R    | 0         | 0         | 0         |
| SJL/J        | R      | R      | R       | R    | R    | 0         | 0         | 0         |
| SWR/J        | R      | R      | R       | R    | R    | 0         | 0         | 0         |
